# Supplementary material
Source: MDPI journal article supplement (https://www.mdpi.com/2073-4395/14/2/386)
Supplement: s1 [file s1]

«PAL-mediated differential response of tomato (*Solanum lycopersicum* L.) cultivars with different stress tolerance to treatment with low-molecular-weight chitosan»

Supplementary 1

Table S1. The experimental scheme for studying low-molecular-weight chitosan hydrolysate on cv. Cherry tomato seedlings.

| Exposition time, h | Chitosan hydrolysate concentration, mg/ml |       |      |     |   |   |
|--------------------|-------------------------------------------|-------|------|-----|---|---|
| 4                  | 0                                         | 0.002 | 0.02 | 0.2 | 2 | 5 |
| 24                 | 0                                         | 0.002 | 0.02 | 0.2 | 2 | 5 |
| 48                 | 0                                         | 0.002 | 0.02 | 0.2 | 2 | 5 |

Supplementary 2

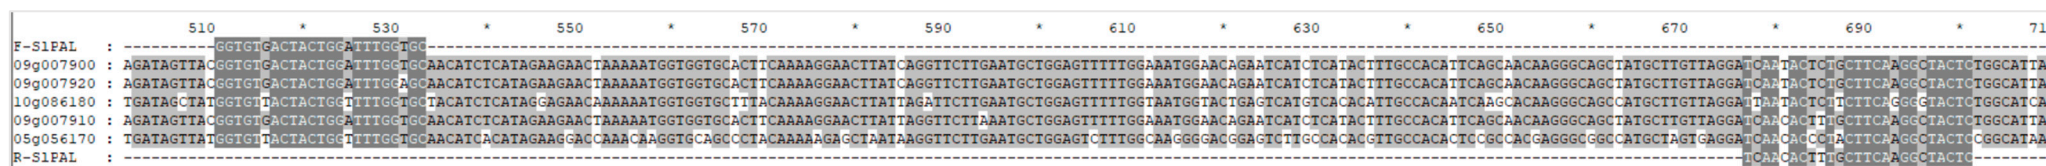

Figure S1. cDNA sequence alignment of the *Solyc10g086180*, *Solyc05g056170*, *Solyc09g007900*, *Solyc09g007910*, *Solyc09g007920* genes and *SIPAL* primers.

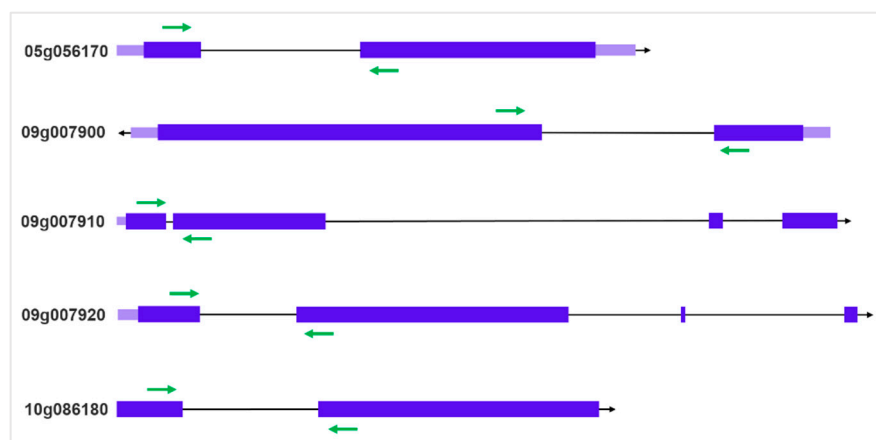

Figure S2. Schematic representation of primer alignment on exons of selected genes of PAL family
